# Supplementary material for: Over-oxidized Mo3Se4 enriched with selenium: an anode for high performance Li-ion batteries
Source: Royal Society of Chemistry journal article supplement (doi:10.1039/d4nj02976c), 2024-01-01
Supplement: d4nj02976c1.pdf [file d4nj02976c1.pdf]

**Supporting Information**

**Over-oxidized Mo<sub>3</sub>Se<sub>4</sub> enriched with selenium: an anode for high performance  
Li-ion batteries**

*Rohan S. Kamat*<sup>a</sup>, *Chetana U. Mulik*<sup>a</sup>, *Xijue Wang*<sup>b</sup>, *Chinmayee Padwal*<sup>b</sup>, *Lata D. Jadhav*<sup>a,\*</sup>,  
*Deepak P. Dubal*<sup>b,\*</sup>

<sup>a</sup> Electrochemical Materials Research Laboratory, Department of Physics, Rajaram College,  
Kolhapur-416004 (Maharashtra), India.

<sup>b</sup> Centre for Materials Science, School of Chemistry and Physics, Queensland University of  
Technology (QUT), 2 George Street, Brisbane, QLD 4000 Australia.

Corresponding authors: \* Prof. (Dr.) Lata D. Jadhav ([ldjadhav.phy@gmail.com](mailto:ldjadhav.phy@gmail.com)) and

\* Prof. (Dr.) Deepak P. Dubal ([deepak.dubal@qut.edu.au](mailto:deepak.dubal@qut.edu.au))

## **Materials and methods**

### **Materials**

Sodium borohydride ( $\text{NaBH}_4$ ) was purchased from Thomas Baker, Ammonium Molybdate (Para) Tetrahydrate  $[(\text{NH}_4)_6\text{Mo}_7\text{O}_{24}\cdot 4\text{H}_2\text{O}]$ , Selenium Oxide ( $\text{SeO}_2$ ) were purchased from Alfa Aesar Pvt. Ltd. All reagents were used without further purification.

### **Synthesis of $\text{Mo}_3\text{Se}_4$**

In a typical synthesis, 0.05 mol of  $(\text{NH}_4)_6\text{Mo}_7\text{O}_{24}\cdot 4\text{H}_2\text{O}$ , 0.7 mol of  $\text{SeO}_2$  and 0.05 mol of  $\text{NaBH}_4$  powders were added step by step to 30 ml stirring double distilled water (DDW). The solution was stirred for 1 hr. Further 30 ml ethanol was added to the solution and stirred for another 30 min. The mixture was transferred to a 100 ml Teflon container. Hydrothermal autoclave reactor was heated at 200 °C for 24 h in a vertical muffle furnace. After the completion of hydrothermal treatment, obtained sediment was washed with DDW using 50 ml centrifuge tubes (3500/5min) for 3 times followed by single wash with ethanol. It was further vacuum dried at 80 °C for 24 h. Finally, black coloured powdered  $\text{Mo}_3\text{Se}_4$  was obtained.

### **Materials Characterizations**

The crystal structure, phase analysis and chemical composition of the obtained sample were investigated using XRD (Bruker Ltd. Germany, AXS D8 Advances), micro-RAMAN (Renishaw UK, INVIA0120-02) and X-ray photoelectron spectroscopy (XPS, Kratos AXIS Supraspectrometer). The morphological studies of the material were performed using a field emission scanning electron microscope (FESEM, TESCAN MIRA) and high-resolution transmission electron microscopy (HRTEM) (JEOL 2100).

### **Electrochemical measurements**

All the electrodes were tested out using CR2032 coin cell assembly. The working electrodes were prepared by casting the slurry made from active material (60 wt.%), Super P (30 wt.%) and PVDF (Polyvinylidene fluoride) binder (10 wt.%) dispersed with drops of NMP (N-Methyl pyrrolidone) homogeneously. All chemicals purchased were of battery grade. The resultant slurry was coated on copper foil followed by vacuum drying at 90° C for 12 h. The average mass loading of active material alone on each electrode was ~ 0.25-0.26 mg/cm<sup>2</sup>. CR2032 cells were assembled using coined copper foil with active material as anode, lithium foil as a counter electrode, electrolyte and glass microfiber separator in an argon-filled glove box with concentrations of moisture and oxygen below 0.5 ppm. The non-aqueous commercial electrolyte (Sigma) contained 1 M  $\text{LiPF}_6$  (lithium hexafluorophosphate) dissolved in ethylene carbonate (EC), dimethyl carbonate (DMC) and ethyl

methyl carbonate (EMC) in 1:1:1 volumetric ratio. Galvanostatic charge–discharge tests were carried out using a Neware battery tester from 0.01 V to 3.0 V versus Li<sup>+</sup>/Li. Cyclic voltammograms (CVs) were measured using a Biologic VMP-3e electrochemical workstation.

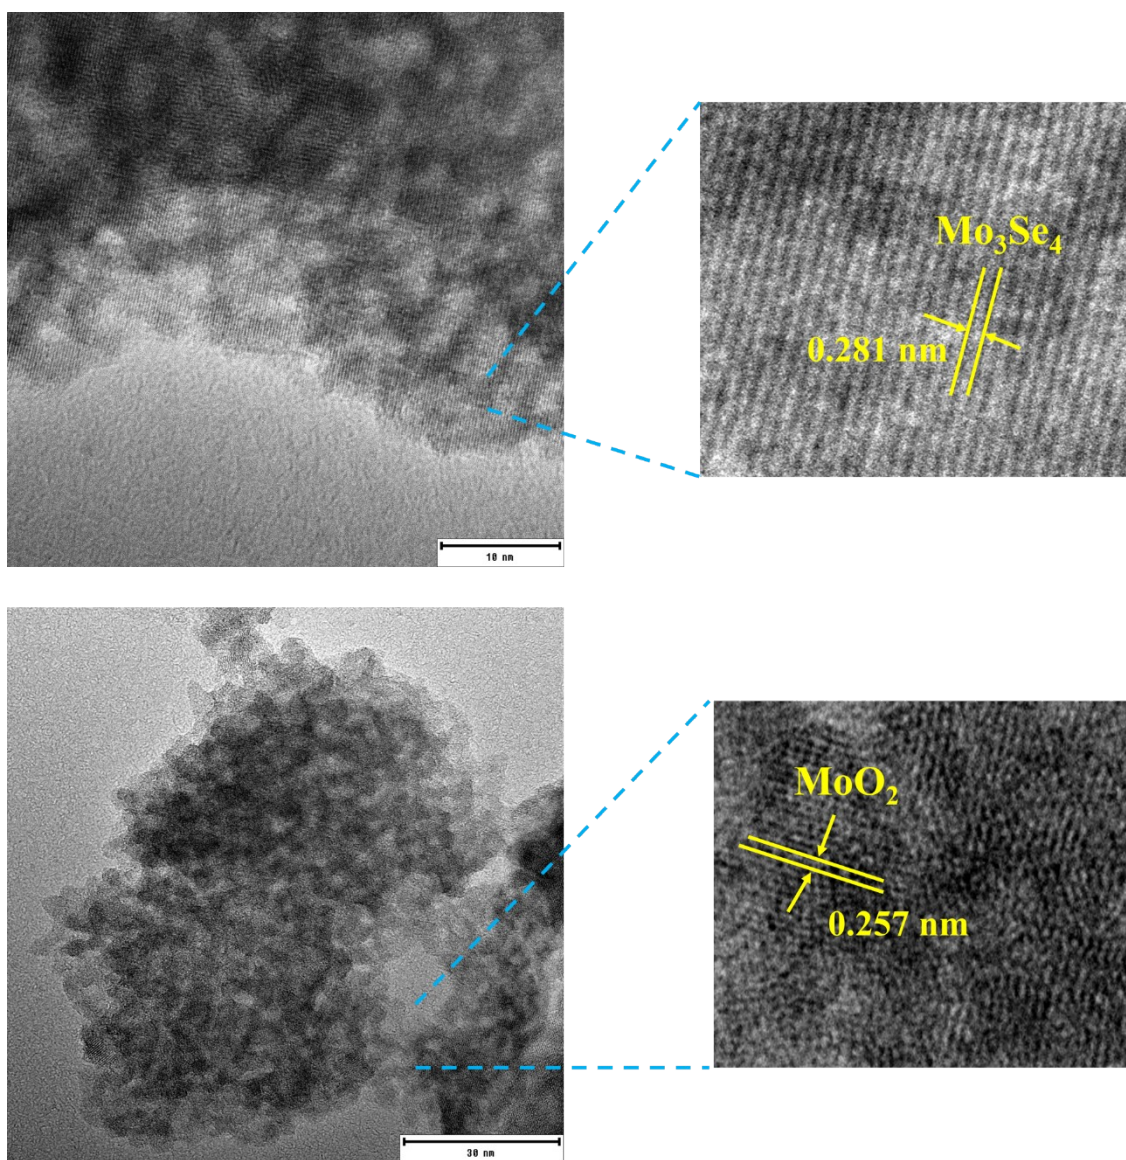

**Fig. S1.** Enlarged magnification of TEM images of Mo<sub>3</sub>Se<sub>4</sub>.

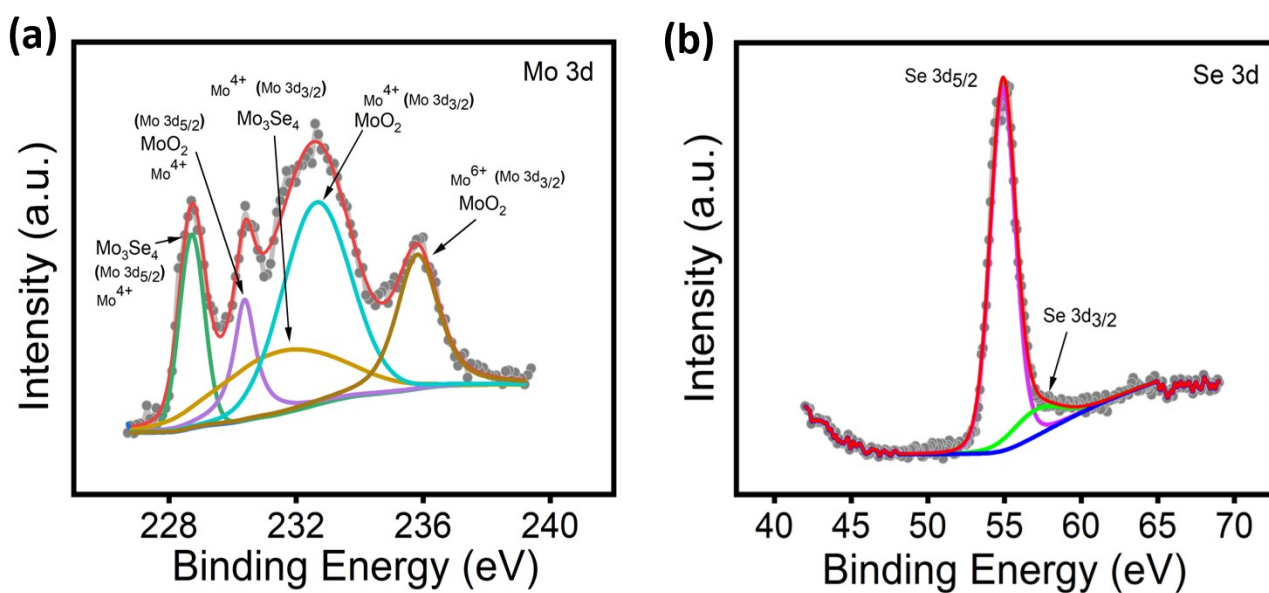

**Fig. S2.** XPS spectra of Mo<sub>3</sub>Se<sub>4</sub> (a) Mo 3d, (b) Se 3d core level spectra

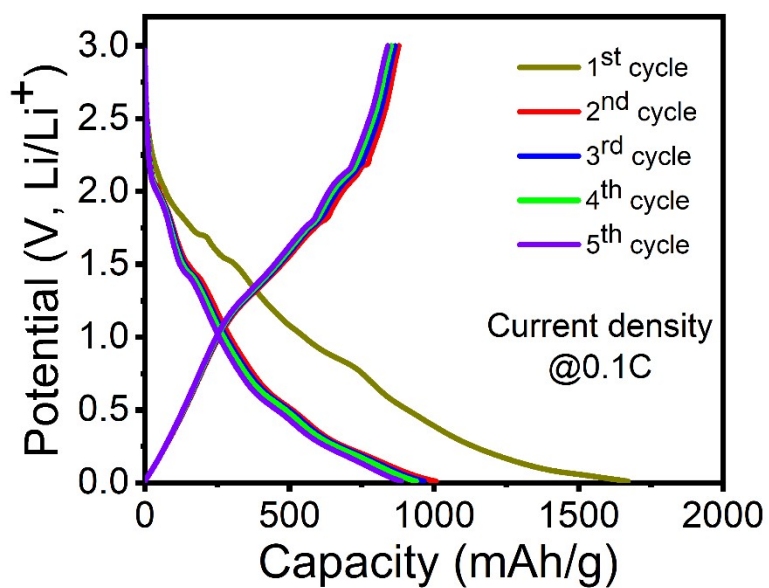

**Fig. S3.** Charge discharge profile of Mo<sub>3</sub>Se<sub>4</sub> at 0.1C (where 1C equals to 670 mA/g).

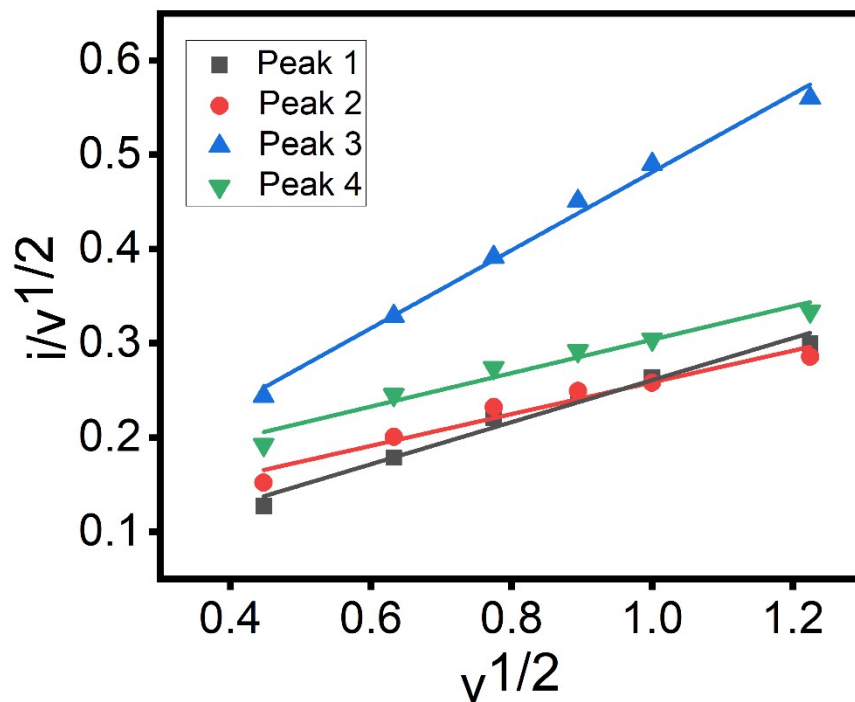

Fig. S4. Plot of  $i/v^{1/2}$  vs.  $v^{1/2}$

Table S1. Comparison of electrochemical performance of various electrodes as anode materials for LIBs.

| <u>Electrode</u>                    | <u>Technique</u>    | <u>Current density</u><br>(mA/g) | <u>Reversible Capacity</u><br>(mAh/g) | <u>Cycle Number</u> | <u>Ref.</u> |
|-------------------------------------|---------------------|----------------------------------|---------------------------------------|---------------------|-------------|
| MoSe <sub>2</sub> /MoO <sub>2</sub> | Hydrothermal method | 100                              | 1042                                  | 100                 | 1           |
| MoSe <sub>2</sub>                   | Hydrothermal method | 100                              | 581                                   | 100                 | 1           |
| CNTs@C@MoSe <sub>2</sub>            | Solvothermal method | 5000                             | 508                                   | 500                 | 2           |
| @Se                                 | method              | 100                              | 1010                                  | 100                 |             |
| CNTs@C@MoSe <sub>2</sub>            | Solvothermal        | 5000                             | 415                                   | 500                 | 2           |

|                                     |                                |               |               |            |                      |
|-------------------------------------|--------------------------------|---------------|---------------|------------|----------------------|
|                                     | method                         |               |               |            |                      |
| 1T-MoSe <sub>2</sub> /<br>SWCNTs    | Solvothermal<br>method         | 300           | 971           | 100        | <sup>3</sup>         |
| MoSe <sub>2</sub> @CC               | Hydrothermal<br>method         | 5000          | 638           | 1200       | <sup>4</sup>         |
| MoSe <sub>2</sub> @N-C              | Hydrothermal<br>method         | 1000          | 1219          | 150        | <sup>5</sup>         |
| MoSe <sub>2</sub> /C                | Nano-casting<br>technique      | 200           | 618           | 300        | <sup>6</sup>         |
| Mo-MoSe <sub>2</sub>                | Jet cavitation<br>process      | 0.1C/<br>0.2C | 550           | 50         | <sup>7</sup>         |
| MoSe <sub>2</sub>                   | Commercial powder              | 0.1C/<br>0.2C | 305           | 50         | <sup>7</sup>         |
| MoSe <sub>2</sub> /rGO              | Hydrothermal<br>method         | 500<br>1000   | 917<br>750    | 100<br>100 | <sup>8</sup>         |
| MoO <sub>2</sub> @MoSe <sub>2</sub> | Hydrothermal<br>method         | 2000          | 520.4         | 400        | <sup>9</sup>         |
| <b>Mo<sub>3</sub>Se<sub>4</sub></b> | <b>Hydrothermal<br/>method</b> | <b>268</b>    | <b>897.62</b> | <b>332</b> | <b>This<br/>work</b> |

## References

- 1 Q. Hao, G. Cui, Y. Zhao and Z. Bakenov, *Nanomaterials*, 2019, **9**, 1256.
- 2 R. Jin, Y. Cui, Q. Wang, G. Li, Y. Cui, Q. Wang and G. Li, *J. Colloid Interface Sci.*, 2017, **508**, 435–442.
- 3 T. Xiang, S. Tao, W. Xu, Q. Fang, C. Wu, D. Liu, Y. Zhou, A. Khalil, Z. Muhammad, W. Chu, Z. Wang, H. Xiang, Q. Liu and L. Song, *ACS Nano*, 2017, **11**, 6483–6491.
- 4 J. Kang, Q. Su, H. Feng, P. Huang, G. Du and B. Xu, *Electrochim. Acta*, 2019, **301**, 29–38.
- 5 P. Ge, H. Hou, C. E. Banks, C. W. Foster, S. Li, Y. Zhang, J. He, C. Zhang and X. Ji, *Energy*

*Storage Mater.*, 2018, **12**, 310–323.

- 6 F. Qin, H. Hu, Y. Jiang, K. Zhang, Z. Fang, Y. Lai and J. Li, *J. Electroanal. Chem.*, 2018, **823**, 67–72.
- 7 Y. Wu and W. Liu, *J. Alloys Compd.*, 2020, **813**, 152074.
- 8 Z. Zhang, Y. Fu, X. Yang, Y. Qu and Z. Zhang, *ChemNanoMat*, 2015, **1**, 409–414.
- 9 X. Zhao, J. Sui, F. Li, H. Fang, H. Wang, J. Li, W. Cai and G. Cao, *Nanoscale*, 2016, **8**, 17902–17910.
